# Supplementary figures and images for: Neurology and neuropsychiatry of COVID-19: a systematic review and meta-analysis of the early literature reveals frequent CNS manifestations and key emerging narratives
Source: HighWire-hosted journal article supplement (doi:10.1136/jnnp-2021-326405), 2021-06-03

## Proportion of patients reporting altered mental status in SARS-CoV-2 infection

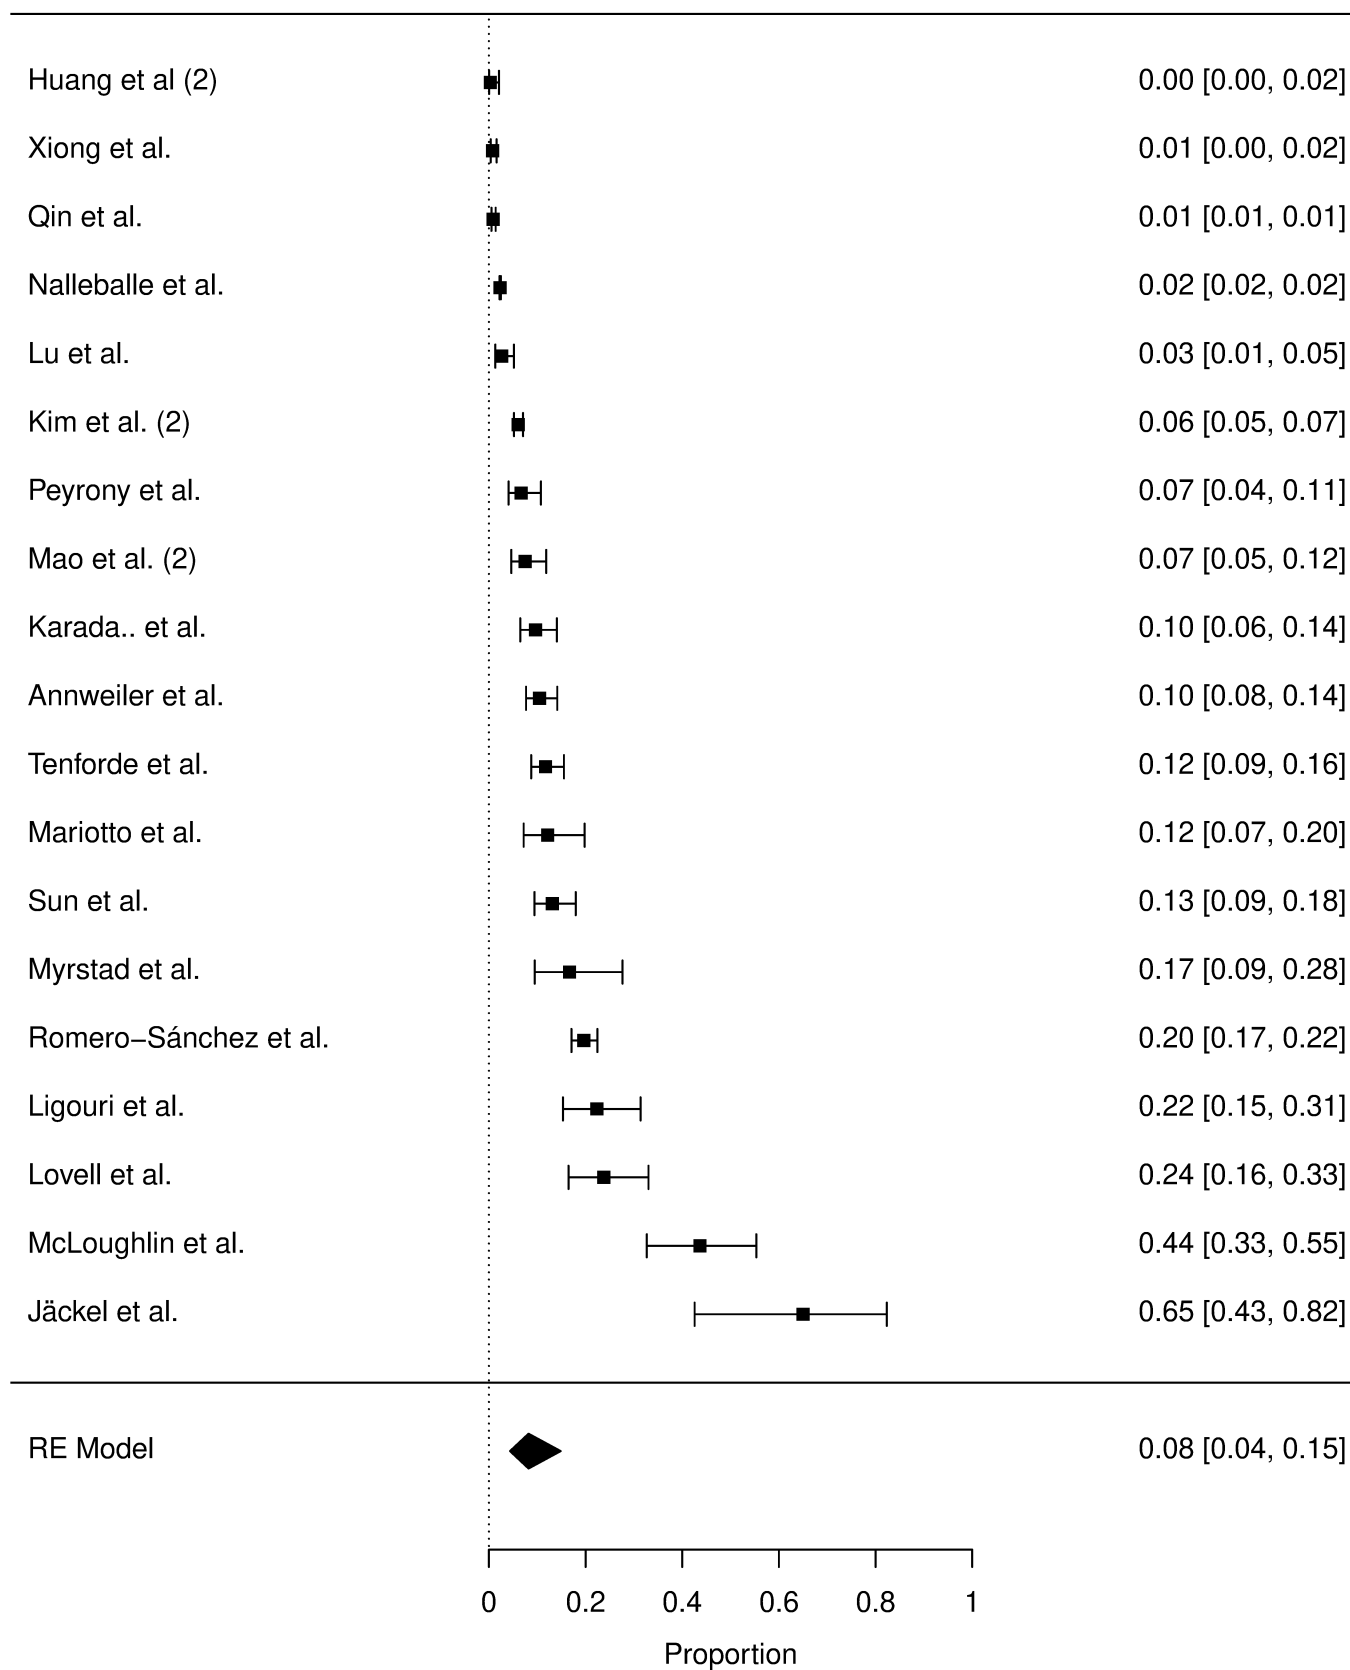

Supplement: jnnp-2021-326405supp012_data_supplement.pdf [file jnnp-2021-326405supp012_data_supplement.pdf]

## Proportion of patients reporting seizures in SARS-CoV-2 infection

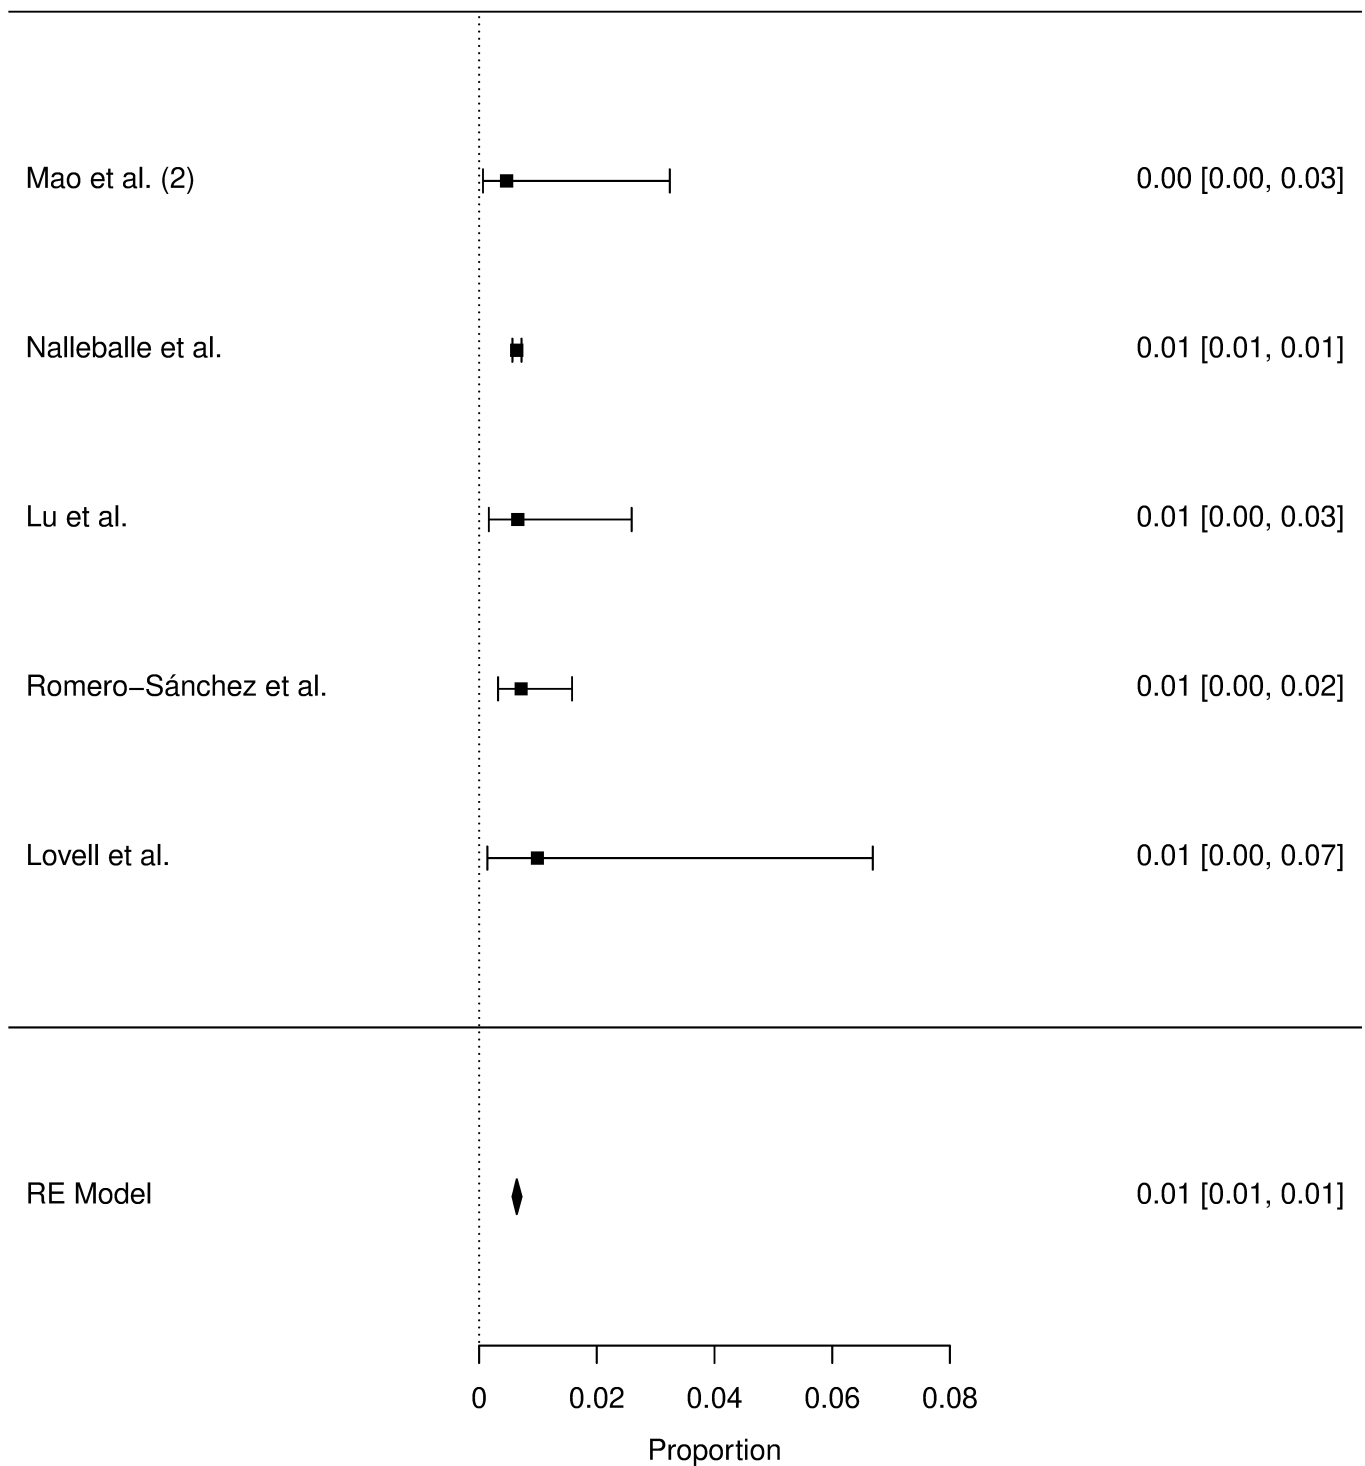

Supplement: jnnp-2021-326405supp020_data_supplement.pdf [file jnnp-2021-326405supp020_data_supplement.pdf]
